# Supplementary material for: A cluster of blood-based protein biomarkers associated with decreased cerebral blood flow relates to future cardiovascular events in patients with cardiovascular disease
Source: PubMed Central journal article supplement (PMC10925867; doi:10.1177/0271678x231195243), 2023-08-12
Supplement: sj-pdf-1-jcb-10.1177_0271678X231195243.pdf [file sj-pdf-1-jcb-10.1177_0271678X231195243.pdf]

## Supplemental material

**Supplemental Table S1.** List of 92 biomarkers involved in the OLINK cardiovascular III panel and medians with interquartile ranges

| <b>Protein</b> | <b>N = 428<sup>1</sup></b> |
|----------------|----------------------------|
| TNFRSF14       | 4.10 (3.87, 4.38)          |
| LDLreceptor    | 3.30 (2.95, 3.74)          |
| ITGB2          | 4.55 (4.29, 4.78)          |
| IL17RA         | 3.60 (3.20, 3.93)          |
| TNFR2          | 5.01 (4.71, 5.31)          |
| MMP9           | 4.45 (3.81, 4.98)          |
| EPHB4          | 4.94 (4.74, 5.15)          |
| IL2RA          | 3.34 (3.04, 3.63)          |
| OPG            | 3.40 (3.18, 3.58)          |
| ALCAM          | 6.99 (6.85, 7.21)          |
| TFF3           | 4.80 (4.59, 5.14)          |
| SELP           | 9.37 (9.02, 9.73)          |
| CSTB           | 3.51 (3.19, 3.91)          |
| MCP1           | 3.42 (3.20, 3.74)          |
| CD163          | 7.28 (6.94, 7.63)          |

| <b>Protein</b> | <b>N = 428<sup>1</sup></b> |
|----------------|----------------------------|
| Gal3           | 2.64 (2.40, 2.87)          |
| GRN            | 4.97 (4.81, 5.18)          |
| BLMhydrolase   | 1.91 (1.72, 2.17)          |
| PLC            | 7.61 (7.46, 7.84)          |
| LTBR           | 3.15 (2.93, 3.38)          |
| Notch3         | 4.89 (4.66, 5.14)          |
| TIMP4          | 3.06 (2.72, 3.39)          |
| CNTN1          | 3.95 (3.73, 4.18)          |
| CDH5           | 3.54 (3.34, 3.77)          |
| TLT2           | 4.56 (4.29, 4.88)          |
| FABP4          | 5.15 (4.61, 5.73)          |
| TFPI           | 8.68 (8.44, 8.89)          |
| PAI            | 4.79 (4.30, 5.44)          |
| CCL24          | 4.48 (3.87, 5.17)          |
| TR             | 4.57 (4.20, 4.95)          |
| TNFRSF10C      | 6.19 (5.78, 6.48)          |
| GDF15          | 5.48 (5.06, 5.90)          |

| <b>Protein</b> | <b>N = 428<sup>1</sup></b> |
|----------------|----------------------------|
| SELE           | 11.46 (11.03, 11.87)       |
| AZU1           | 1.46 (1.19, 1.77)          |
| DLK1           | 5.36 (4.96, 5.83)          |
| SPON1          | 1.23 (1.05, 1.38)          |
| MPO            | 2.48 (2.23, 2.71)          |
| CXCL16         | 4.74 (4.56, 4.90)          |
| IL6RA          | 11.53 (11.23, 11.78)       |
| RETN           | 5.79 (5.48, 6.17)          |
| IGFBP1         | 3.63 (2.80, 4.40)          |
| CHIT1          | 4.92 (4.16, 5.53)          |
| TRAP           | 3.06 (2.80, 3.30)          |
| GP6            | 2.21 (1.56, 2.73)          |
| PSPD           | 2.36 (1.93, 2.82)          |
| PI3            | 1.72 (1.33, 2.17)          |
| EpCAM          | 4.97 (4.28, 5.77)          |
| APN            | 4.34 (4.19, 4.51)          |
| AXL            | 8.19 (7.99, 8.41)          |

| <b>Protein</b> | <b>N = 428<sup>1</sup></b> |
|----------------|----------------------------|
| IL1RT1         | 5.78 (5.61, 5.98)          |
| MMP2           | 3.14 (2.93, 3.37)          |
| FAS            | 5.41 (5.19, 5.62)          |
| MB             | 7.07 (6.70, 7.57)          |
| TNFSF13B       | 6.74 (6.52, 6.99)          |
| PRTN3          | 3.11 (2.85, 3.40)          |
| PCSK9          | 2.45 (2.20, 2.71)          |
| UPAR           | 4.77 (4.50, 5.03)          |
| OPN            | 6.75 (6.40, 7.10)          |
| CTSD           | 2.01 (1.74, 2.31)          |
| PGLYRP1        | 6.96 (6.62, 7.34)          |
| CPA1           | 5.41 (4.94, 5.84)          |
| JAMA           | 3.84 (3.47, 4.27)          |
| Gal4           | 3.17 (2.83, 3.55)          |
| IL1RT2         | 4.75 (4.56, 4.94)          |
| SHPS1          | 3.08 (2.77, 3.33)          |
| CCL15          | 6.38 (6.13, 6.82)          |

| <b>Protein</b> | <b>N = 428<sup>1</sup></b> |
|----------------|----------------------------|
| CASP3          | 6.89 (5.82, 7.59)          |
| uPA            | 4.10 (3.90, 4.31)          |
| CPB1           | 5.24 (4.80, 5.67)          |
| CHI3L1         | 3.71 (3.14, 4.53)          |
| ST2            | 3.67 (3.37, 4.00)          |
| tPA            | 6.07 (5.66, 6.39)          |
| SCGB3A2        | 2.08 (1.52, 2.58)          |
| EGFR           | 2.46 (2.34, 2.58)          |
| IGFBP7         | 7.23 (7.03, 7.45)          |
| CD93           | 10.65 (10.44, 10.86)       |
| IL18BP         | 5.34 (5.11, 5.59)          |
| COL1A1         | 2.60 (2.39, 2.88)          |
| PON3           | 5.60 (5.18, 6.05)          |
| CTS2           | 4.88 (4.62, 5.14)          |
| MMP3           | 7.12 (6.58, 7.56)          |
| RARRES2        | 10.90 (10.68, 11.15)       |
| ICAM2          | 4.64 (4.39, 4.90)          |

| <b>Protein</b>                   | <b>N = 428<sup>1</sup></b> |
|----------------------------------|----------------------------|
| KLK6                             | 1.65 (1.40, 1.95)          |
| PDGFsubunitA                     | 2.73 (2.17, 3.32)          |
| TNFR1                            | 5.93 (5.70, 6.26)          |
| IGFBP2                           | 7.54 (7.01, 8.05)          |
| vWF                              | 6.88 (6.30, 7.34)          |
| PECAM1                           | 4.00 (3.75, 4.26)          |
| MEPE                             | 5.02 (4.72, 5.34)          |
| CCL16                            | 5.85 (5.51, 6.19)          |
| NTproBNP                         | 3.77 (2.93, 4.76)          |
| <b><sup>1</sup> Median (IQR)</b> |                            |

**Supplemental Table S2.** Frequency of different types of cardiovascular events

| <b>Event types</b>              | <b>N</b> |
|---------------------------------|----------|
| <b>Cerebrovascular events</b>   |          |
| Transient Ischemic Attack (TIA) | 6        |
| Ischemic stroke                 | 5        |
| Intracerebral hemorrhage        | 2        |
| Subarachnoid hemorrhage         | 3        |

| <b>Cardiovascular events</b>                           |    |
|--------------------------------------------------------|----|
| Angina pectoris                                        | 12 |
| Myocardial infarction                                  | 6  |
| Angioplasty/stent                                      | 7  |
| Coronary bypass                                        | 1  |
| Other (e.g. ICD implantation, cardioversion, ablation) | 22 |

**Supplemental Table S3.** Logistic regression model results with cardiovascular events as outcome.

| Variable                 | log(OR) <sup>1</sup> | 95% CI <sup>1</sup> | p-value |
|--------------------------|----------------------|---------------------|---------|
| <b>BCS<sup>2</sup></b>   | 0.78                 | 0.28, 1.3           | 0.003   |
| <b>SCORE<sup>2</sup></b> | -2.1                 | -7.8, 3.0           | 0.4     |

1 OR = Odds Ratio, CI = Confidence Interval

2 BCS = Biomarker Compound Score, SCORE = Systematic COronary Risk Evaluation

**Supplemental Figure S1.** Flowchart of the study population selection.

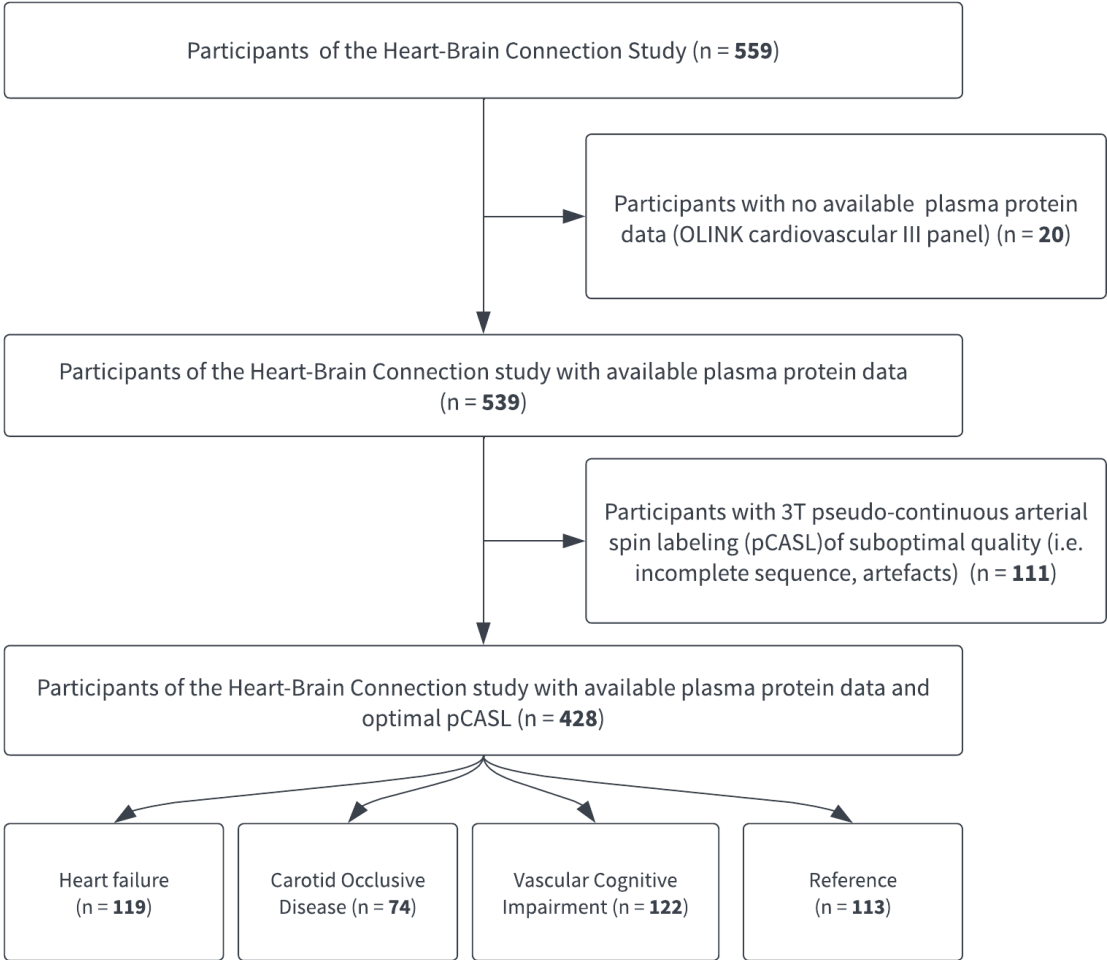



**Supplemental Figure S2.** Relationship between cerebral blood flow (CBF) and cardiovascular risk (SCORE)

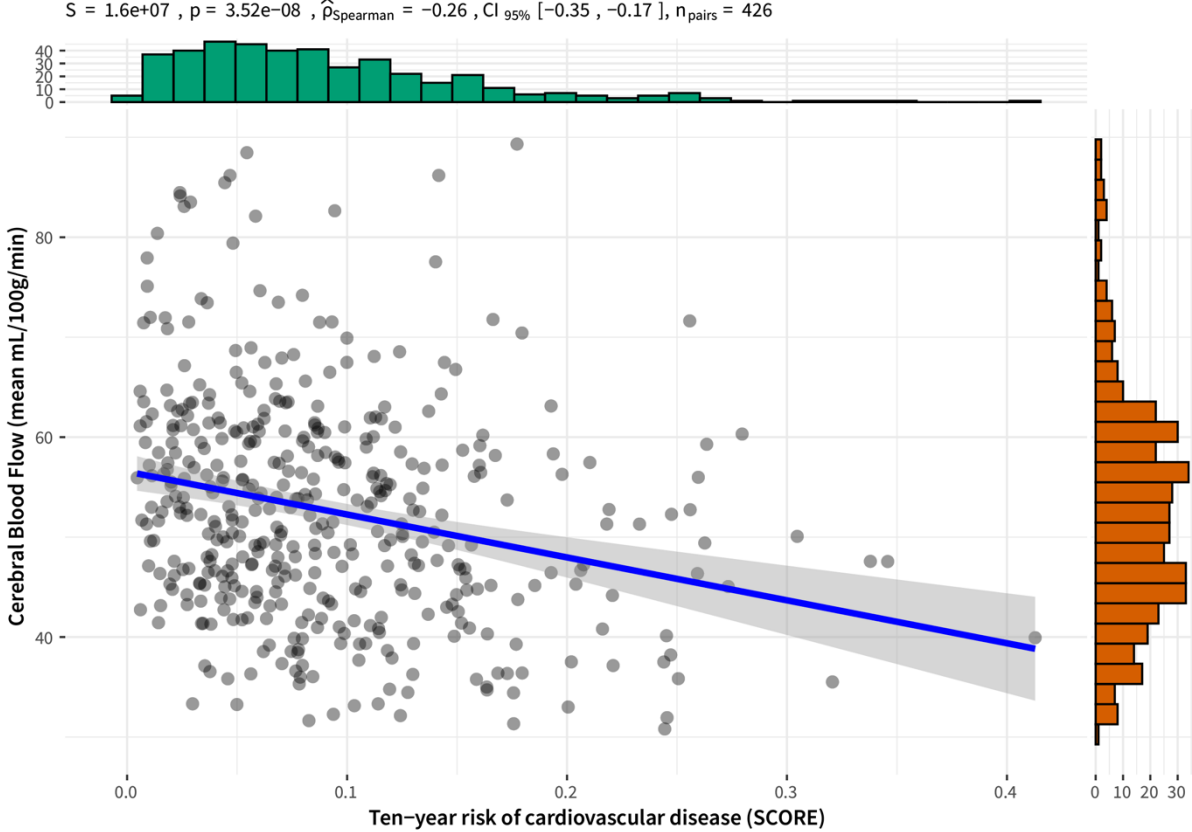

The histograms show the distribution of CBF (orange) and SCORE (green).

**Supplemental Figure S3.** Relationship between the Biomarker Compound Score (BCS) in NPX and Cerebral Blood Flow (CBF) in mL/100g/min, stratified by participant group

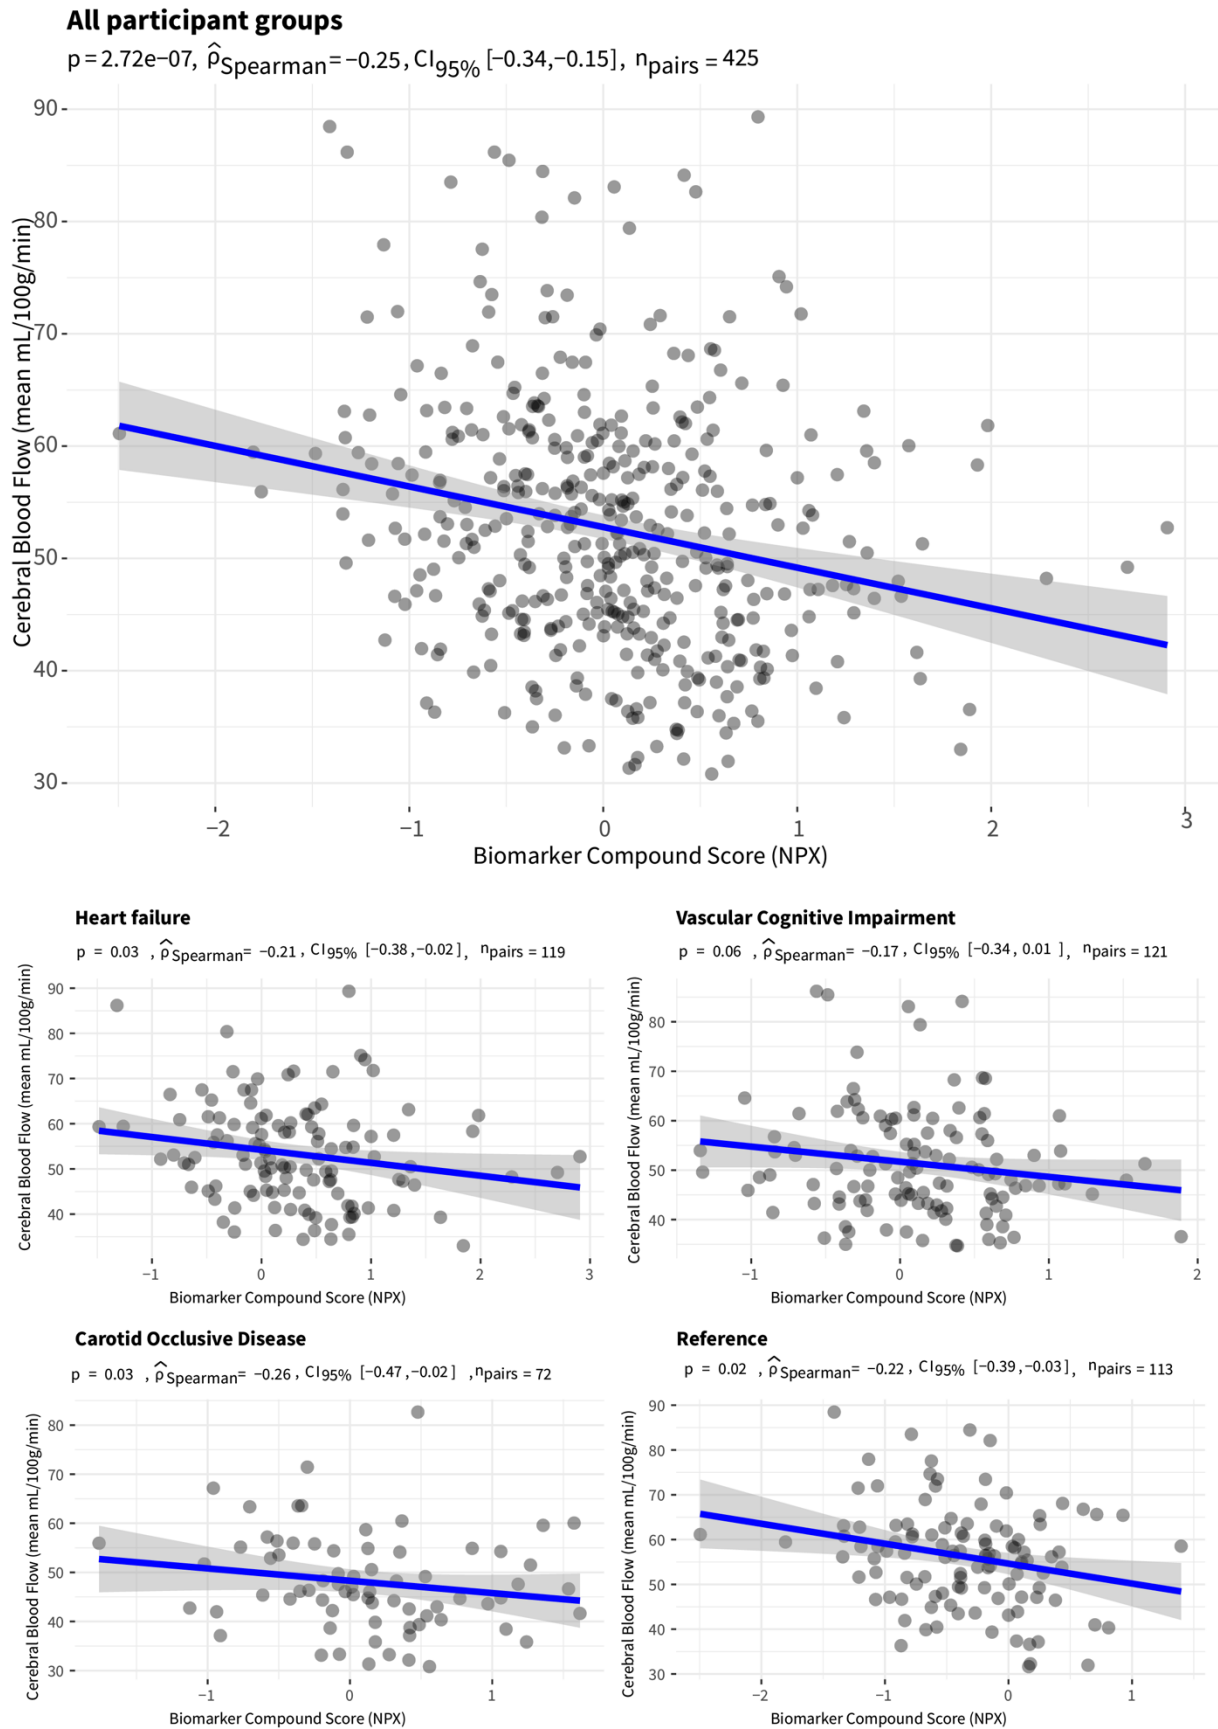

**Supplemental Figure S4**

Relationship between the Biomarker Compound Score (BCS) in Normalized Protein eXpression (NPX) and cardiovascular risk (SCORE).

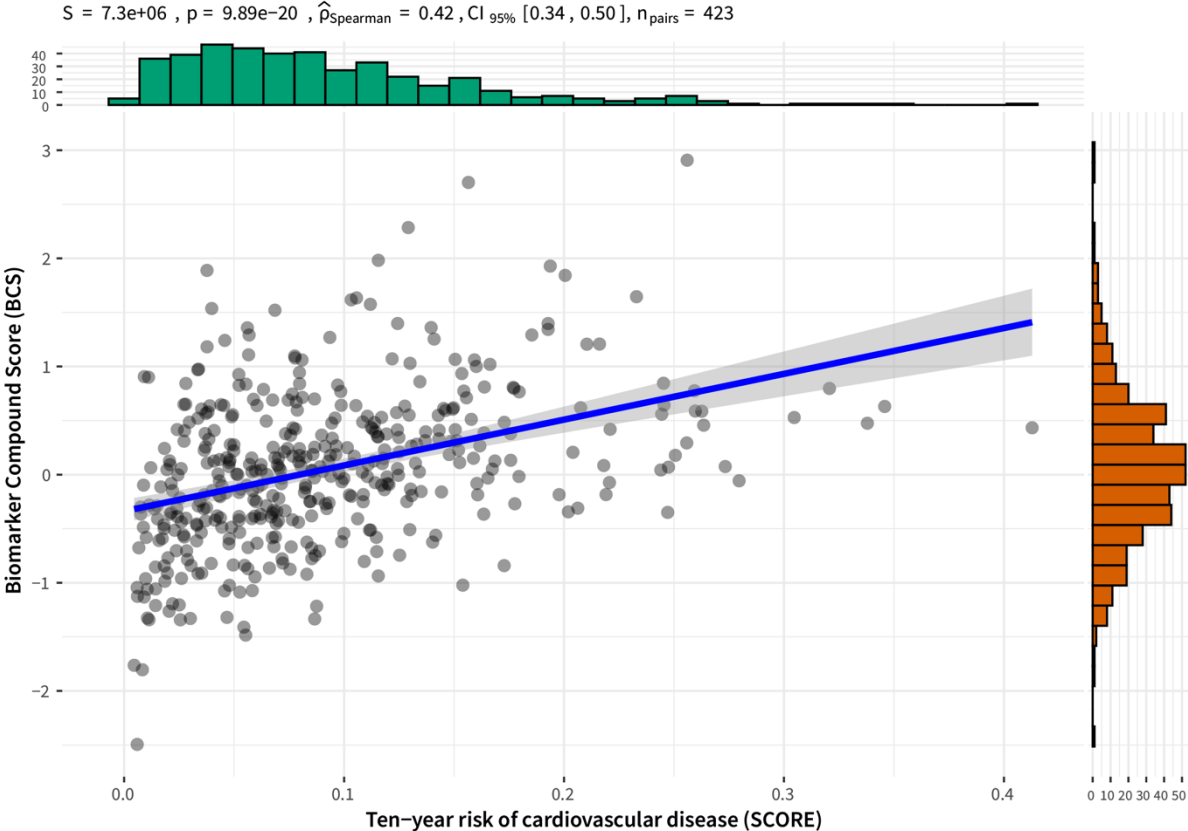

The histograms show the distribution of the BCS (orange) and SCORE (green).
